# Supplementary material for: Novel Immunoglobulin Domain Proteins Provide Insights into Evolution and Pathogenesis Mechanisms of SARS-Related Coronaviruses
Source: PubMed Central journal article supplement — bioRxiv. 2020 Mar 7:2020.03.04.977736. Preprint. [Version 1] doi: 10.1101/2020.03.04.977736 (PMC7217140; doi:10.1101/2020.03.04.977736), 2020-03-07
Supplement: NIHPP2020.03.04.977736-supplement-1.pdf [file NIHPP2020.03.04.977736-supplement-1.pdf]

## SUPPLEMENTAL INFORMATION

### Supplementary Figure S1. Genome comparison analysis of SARS-related CoVs.

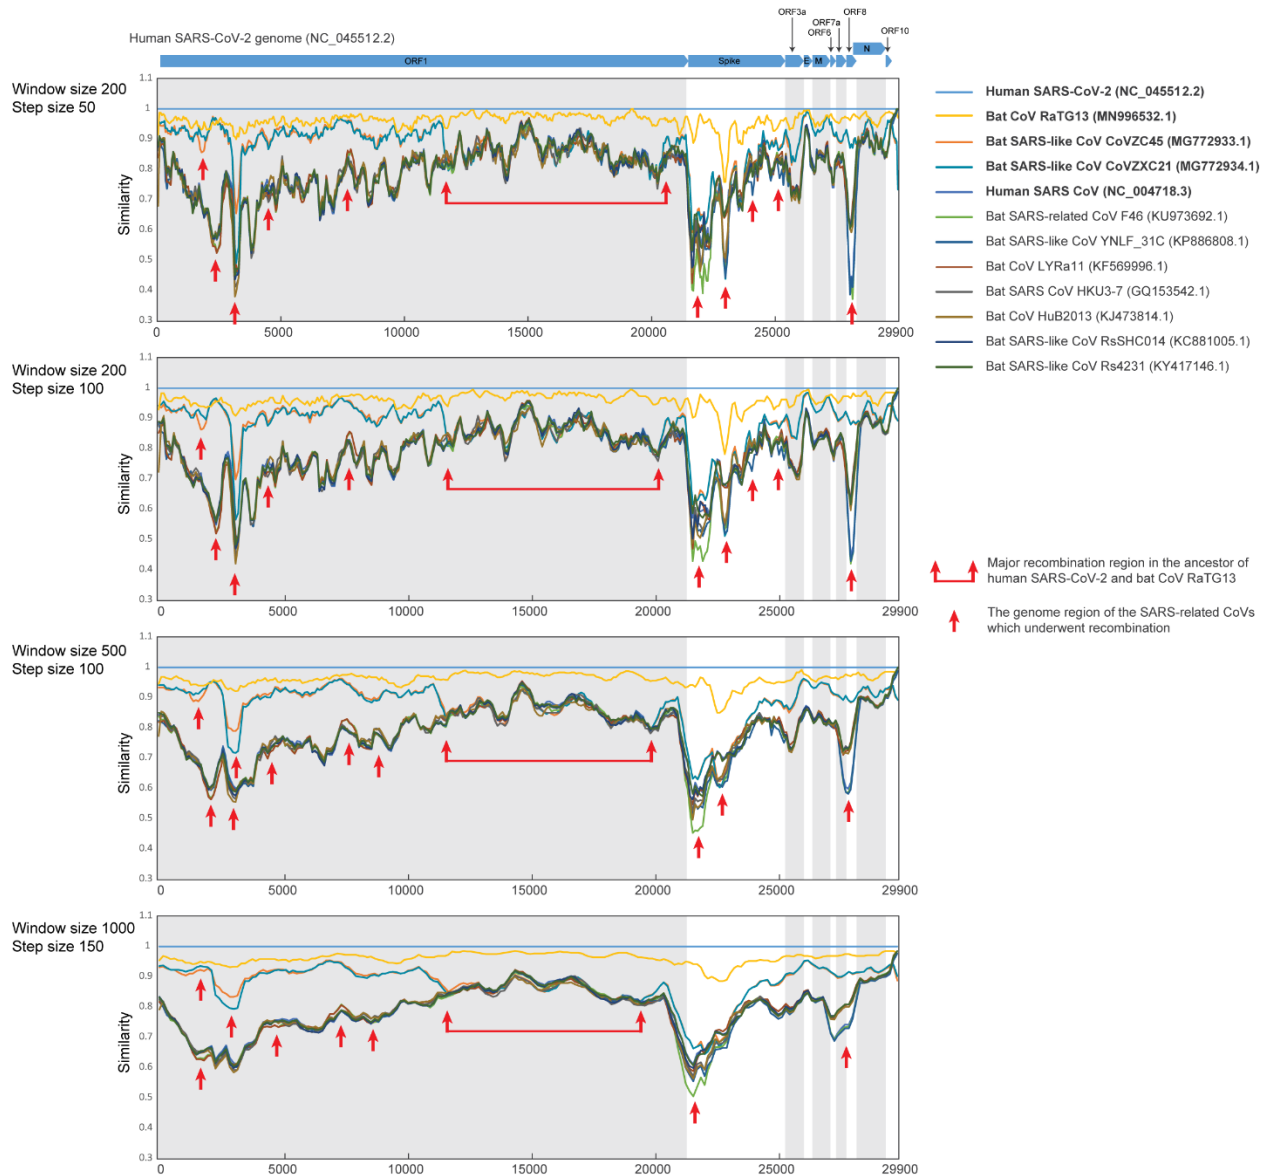

Similarity Plot of SARS-related CoVs against human SARS-CoV-2 Wuhan-Hu-1 genome (NC\_045512.2) based on a multiple sequence alignment of the whole genomes. Each point represents a different slicing window size from the alignment with a different step size between each point. For each plot, the window size and step size are shown in the top left. Horizontal bars above the top plot correspond to the different open reading frames of the SARS-CoV-2 genome (NC\_045512.2). Each different colored line corresponds to the nucleotide similarity between the human SARS-CoV-2 genome (NC\_045512.2) and the respective SARS-related CoV genome. The red arrows and solid lines surround regions which display recombination within the SARS-related CoV genomes. The single red arrows point to specific regions of recombination.

### Supplementary Figure S2. Full length multiple sequence alignment of ORF7a, ORF8-Ig and ORF7a/8-like proteins.

Each sequence in the MSA was labelled by its species abbreviation followed by its isolation and NCBI accession number. The predicted secondary structure is shown above the alignment and the consensus is shown below the alignment, where h stands for hydrophobic residues, s for small residues, and p for polar residues. The characteristic signal peptide, TM region and a stretch of basic residues are also labeled.

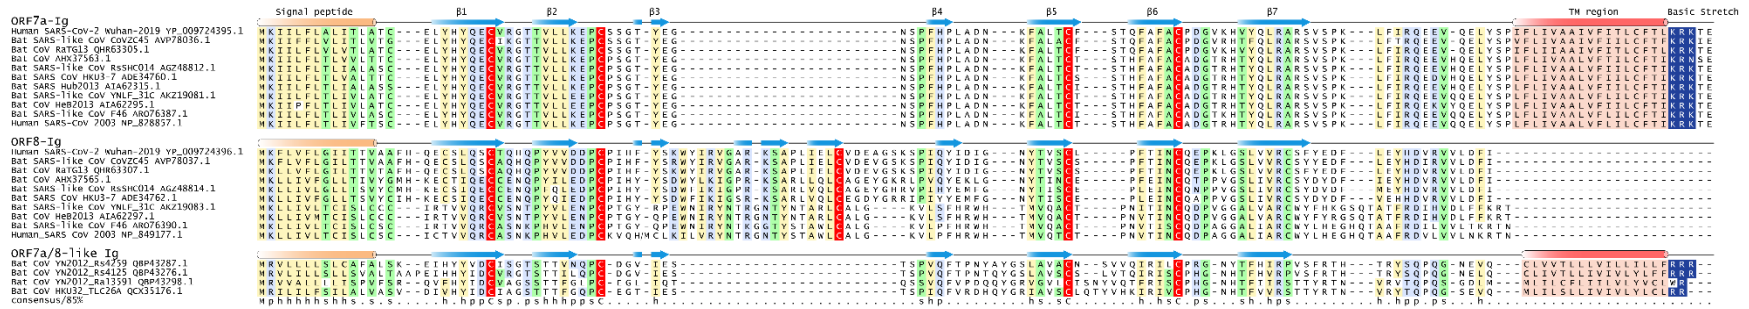

### Supplementary Figure S3. Structural analysis of CoV Ig domains.

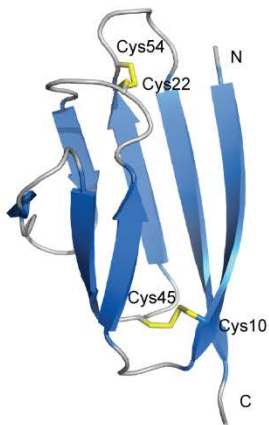

ORF7a-Ig domain  
(PDB: 1xak\_A)

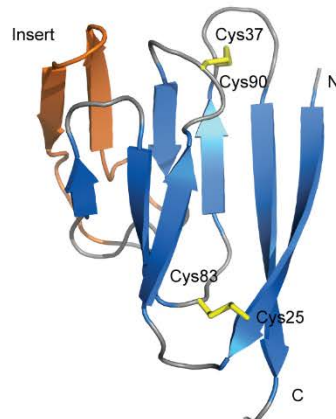

Model of ORF8-Ig domain

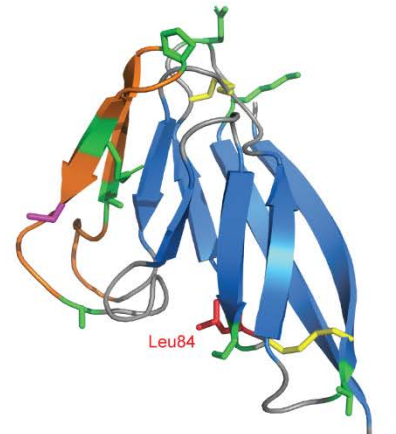

Location of highly variable  
residues of ORF8-Ig domain  
(sticks in green and red)

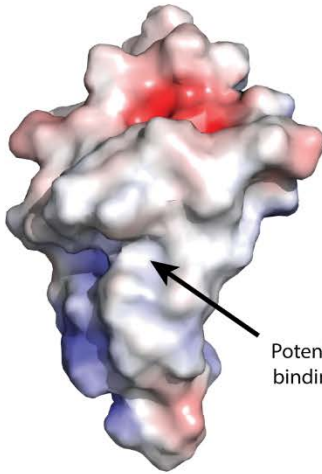

Surface view of ORF7a-Ig domain  
(PDB: 1xak\_A)

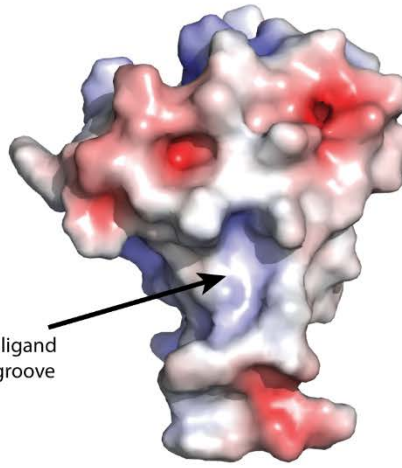

Surface view of ORF8-Ig domain

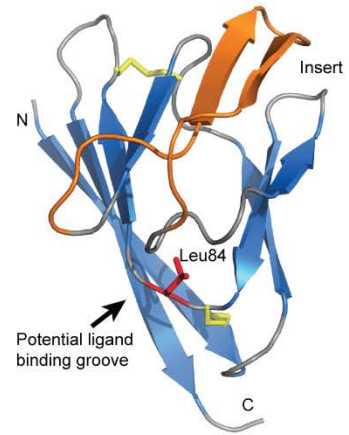

Location of hypervariable residue Leu84  
on substrate-binding groove of the ORF8-Ig domain  
(stick in red)

## Supplementary Figure S4. Multiple sequence alignment of alphacoronavirus E3-CR1-like Ig domain proteins and their related Ig domains identified by profile-profile searches.

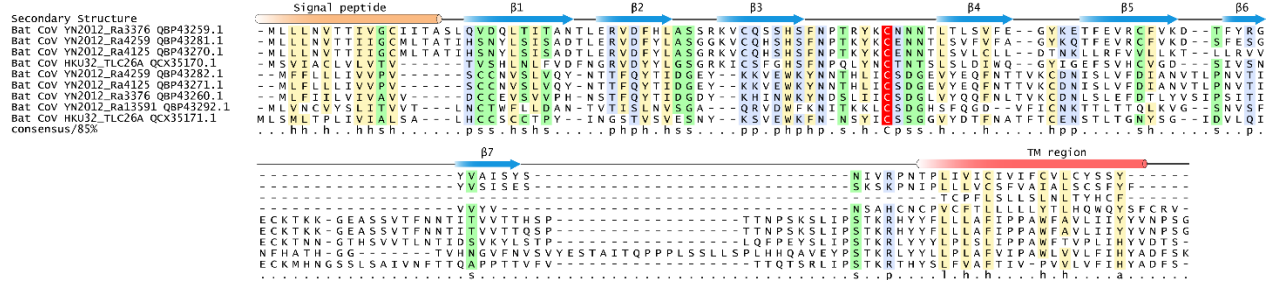

>PF02440.15 ; Adeno\_E3\_CR1 ; Adenovirus E3 region protein CR1  
 Probab=90.89 E-value=2.8 Score=29.56 Aligned\_cols=38 Identities=18% Similarity=0.352 Sum\_probs=0.0 Template\_Neff=6.800

|   |                |    |                                                   |    |       |
|---|----------------|----|---------------------------------------------------|----|-------|
| Q | QBP43282.1     | 24 | QYTI DGE-YKQVEWK---YNNTLHICSDGEVYEQFNTTVKCDNISLVF | 67 | (114) |
| Q | Consensus      | 24 | s~svd~~~y~rVdw-----n~s~kICs~ghsfn~f~~~~kC~N~TLt~  | 67 | (114) |
| T | Consensus      | 17 | NvTL~g~~~~V~Wyr~~~~~LC~~~~~C~~~~nLtL              | 59 | (88)  |
| T | E3TMR2_ADE16/1 | 17 | TCTLQGPQEGHVWWRVYDNGGFARPCDQPGTK-----FSCNGRDLTI   | 59 | (88)  |
| T | ss_pred        |    | cEEeCCCCCceEEeEcccCCCCccccCCce-----eEeCCCCeEE     |    |       |

>6JXR\_n T-cell surface glycoprotein CD3 zeta; IMMUNE SYSTEM Homo sapiens  
 Probability: 62.4%, E-value: 84, Score: 22.12, Aligned cols: 126, Identities: 11%, Similarity: 0.052,

|   |            |     |                                                                                  |     |       |
|---|------------|-----|----------------------------------------------------------------------------------|-----|-------|
| Q | Q_9601142  | 19  | VQYNTTFQYTI DGEYK---KVEWKYNNTLHICSDGEVYEQFN-----TTVKCDNISLVFDIANVTLPNVTIECKTKKGE | 89  | (148) |
| Q | Consensus  | 19  | ~~~n~t~~~tv~g~yk---VeWk~N~s~~iCsdG~vyq~fn-----t~~Cdn~tL~~~~~vs~p~vtieck~~~G~     | 89  | (148) |
| T | Consensus  | 135 | ~g~~~~~l~C~~~~~W~~~~~l~i~~~~~d~g~y~C~~~~~                                        | 214 | (291) |
| T | 6JXR_n     | 135 | HTQKATLVCLATGFYPDHVELSWWVNGKEVHSGVSTDPQLPEQPALNDSRYCLSSRLRVSATFWQPNRHFRCQVQFYG   | 214 | (291) |
| Q | Q_9601142  | 90  | ASSVTFNNTITVVTTHSPPTNPSKSLIPSTKRH-----YFLLLAIPPFAVLIYYV                          | 144 | (148) |
| Q | Consensus  | 90  | ~~~~~vnn~~~~tt~~p~~p~~sLiPSTKR-----yY~L~lafi~paw~V~iihYv                         | 144 | (148) |
| T | Consensus  | 215 | ~~~~~l~C~~~~~W~~~~~l~i~~~~~d~g~y~C~~~~~                                          | 279 | (291) |
| T | 6JXR_n 215 |     | LSENDWQDRAPVTQIVSAEAWGRADCGFTSESYQGVLSATILYEILLGKATLYAVLVSAV                     | 279 | (291) |

>3OQ3\_B Interferon alpha-5, IFN-alpha/beta binding protein; Ectromelia, Mousepox Virus, Moscow strain; Mus musculus  
 Probability: 51.52%, E-value: 150, Score: 21.59, Aligned cols: 82, Identities: 12%, Similarity: 0.143,

|   |           |     |                                                                                 |     |       |
|---|-----------|-----|---------------------------------------------------------------------------------|-----|-------|
| Q | Q_9601142 | 19  | VQYNTTFQYTI DGEYK---KVEWKYNNTLHICSDGEVYEQFNTTVKCDNISLVFDIANVTLPNVTIECKTKKGEASSV | 93  | (148) |
| Q | Consensus | 19  | ~~~n~t~~~tv~g~yk---VeWk~N~s~~iCsdG~vyq~fn~t~~Cdn~tL~~~~~vs~p~vtieck~~~G~        | 93  | (148) |
| T | Consensus | 242 | ~~~~~l~C~~~~~W~~~~~l~i~~~~~d~g~y~C~~~~~                                         | 321 | (329) |
| T | 3OQ3_B    | 242 | IGEPANITCTAVSTSLVDDVLIDWENPBGWIIGLDGVVYSLTSSGGITEATLYFENVTEEYIGNTYTCRGNHYYPDKT  | 321 | (329) |
| Q | Q_9601142 | 94  | TFNNTIT 100 (148)                                                               |     |       |
| Q | Consensus | 94  | ~~~~~vnn~~~~ 100 (148)                                                          |     |       |
| T | Consensus | 322 | ~~~~~l~v 328 (329)                                                              |     |       |
| T | 3OQ3_B    | 322 | LTTTVVL 328 (329)                                                               |     |       |

**Supplementary Table S1. Detailed information of Human SARS-CoV-2 Wuhan-Hu-1 genome and other SARS-related genomes that were used in this study (Figure 1 & Figure S1).**

| Organism                                                                        | Host  | NCBI ID     | Year | Citation                                                                                                                   |
|---------------------------------------------------------------------------------|-------|-------------|------|----------------------------------------------------------------------------------------------------------------------------|
| Severe acute respiratory syndrome coronavirus 2 (SARS-CoV-2) isolate Wuhan-Hu-1 | Human | NC_045512.2 | 2020 | A novel coronavirus associated with a respiratory disease in Wuhan of Hubei province, China (Unpublished)                  |
| Bat SARS-like coronavirus isolate bat-SL-CoVZC45                                | Bat   | MG772933.1  | 2018 | (1)                                                                                                                        |
| Bat SARS-like coronavirus isolate bat-SL-CoVZXC21                               | Bat   | MG772934.1  | 2018 | (1)                                                                                                                        |
| Bat coronavirus isolate RaTG13                                                  | Bat   | MN996532.1  | 2020 | Not Available                                                                                                              |
| Severe acute respiratory syndrome-related coronavirus                           | Human | NC_004718.3 | 2003 | (2)                                                                                                                        |
| Severe acute respiratory syndrome-related coronavirus isolate F46               | Bat   | KU973692.1  | 2017 | Identification of a new intermediate virus between bat-CoVs and SARS-CoVs from least horseshoe bats in China (Unpublished) |
| Bat SARS-like coronavirus YNLF_31C                                              | Bat   | KP886808.1  | 2015 | Not Available                                                                                                              |
| Rhinolophus affinis coronavirus isolate LYRa11                                  | Bat   | KF569996.1  | 2014 | (3)                                                                                                                        |
| Bat SARS coronavirus HKU3-7                                                     | Bat   | GQ153542.1  | 2010 | (4)                                                                                                                        |
| BtRs-BetaCoV/HuB2013                                                            | Bat   | KJ473814.1  | 2015 | (5)                                                                                                                        |
| Bat SARS-like coronavirus RsSHC014                                              | Bat   | KC881005.1  | 2013 | (6)                                                                                                                        |
| Bat SARS-like coronavirus isolate Rs4231                                        | Bat   | KY417146.1  | 2017 | (7)                                                                                                                        |

**Supplementary Table S2. Summary of representatives of viral Ig domain proteins which were identified in this study.**

| Family                    | Genus             | Organism                     | NCBI ID                    | pfam ID | Domain Family     | Presence of Signal Peptide (Y/N)* | Number of Ig-like domain | Number of TM region** | Distinct Relative PDB Structure# |
|---------------------------|-------------------|------------------------------|----------------------------|---------|-------------------|-----------------------------------|--------------------------|-----------------------|----------------------------------|
| Coronaviridae             | Beta-coronavirus  | SARS-CoV-2                   | YP_009724395.1             | PF08779 | SARS_X4           | Y                                 | 1                        | 1                     | 1XAK_A                           |
|                           |                   |                              | YP_009724396.1             | PF12093 | Corona_NS8        | Y                                 | 1                        | 0                     | 1XAK_A                           |
|                           |                   | SARS-CoV                     | NP_828857.1                | PF08779 | SARS_X4           | Y                                 | 1                        | 1                     | 1XAK_A                           |
|                           |                   |                              | NP_828876.1<br>NP_828877.1 | PF08779 | Corona_NS8        | Y                                 | 1                        | 0                     | 1XAK_A                           |
|                           | Alpha-coronavirus | Bat coronavirus              | QBP43259.1                 | n/a     | Adeno_E3_CR1-like | Y                                 | 1                        | 1                     | 5XMZ_A                           |
|                           |                   |                              | QBP43265.1                 | PF08779 | SARS_X4           | Y                                 | 1                        | 1                     | 1XAK_A                           |
| Adenoviridae              | Mast-adenovirus   | Human adenovirus 7d          | AAF14132.1                 | PF02440 | Adeno_E3_CR1      | Y                                 | 1                        | 1                     | 6JXR_d                           |
|                           |                   | Human adenovirus 23          | AFK92306.1                 | PF02440 | Adeno_E3_CR1      | Y                                 | 3                        | 1                     | 3J8F_7                           |
|                           |                   | Human adenovirus 21          | AAW33363.1                 | PF04881 | Adeno_GP19K       | Y                                 | 1                        | 1                     | 5IRO_P                           |
| Herpesviridae             | Mardivirus        | Gallid alphaherpesvirus 2    | YP_001034013.1             | PF02480 | Herpes_gE         | Y                                 | 1                        | 1                     | 2GJ7_F                           |
|                           |                   |                              | YP_001034012.1             | PF01688 | Herpes_gI         | Y                                 | 1                        | 1                     | 5OR7_C                           |
|                           |                   |                              | YP_001033973.1             | PF02124 | Marek_A           | Y                                 | 3                        | 1                     | 3J8F_7                           |
|                           | Simplexvirus      | Macacine alpha-herpesvirus 1 | NP_851925.1                | PF01537 | Herpes_glycop_D   | Y                                 | 1                        | 1                     | 4MYV_A                           |
|                           | Rhadinovirus      | Human gamma-herpesvirus 8    | YP_001129350.1             | PF02960 | K1                | Y                                 | 2                        | 1                     | 5D6D_C                           |
|                           | Cytomegalo-virus  | Panine beta-herpesvirus 2    | NP_612760.1                | PF16758 | UL141             | Y                                 | 1                        | 1                     | 4JMO_B                           |
|                           |                   |                              | NP_612778.1                | PF05963 | Cytomega_US3      | Y                                 | 1                        | 1                     | 1IM3_P                           |
|                           |                   | Human beta-herpesvirus 5     | ABV71546.1                 | PF17622 | UL16              | Y                                 | 1                        | 1                     | 2WY3_B                           |
| Aotine beta-herpesvirus 1 |                   | YP_004940175.1               | PF08001                    | CMV_US  | Y                 | 1                                 | 2                        | 1IM3_P                |                                  |
| Poxviridae                | Orthopoxvirus     | Variola virus                | NP_042191.1                | PF08204 | V-set_CD47        | Y                                 | 1                        | 5                     | 5OR7_C                           |
|                           |                   | Ectromelia virus             | 3OQ3_B                     | PF13895 | ig                | Y                                 | 3                        | 0                     | 3OQ3_B                           |
| Phenuiviridae             | Goukovirus        | Cumuto virus                 | YP_009664616.1             | PF07245 | Phlebovirus_G2    | Y                                 | 4                        | 1                     | 6F8P_A<br>6EGU_B                 |

\* Signal Peptide Prediction was conducted by SignalP-5.0 program (8).

\*\* Transmembrane (TM) region predictions were conducted by TMHMM Server (9).

# The PDB structures which display similarity with the respective viral Ig domains identified by profile-profile comparisons (10).

## REFERENCES

1. D. Hu *et al.*, Genomic characterization and infectivity of a novel SARS-like coronavirus in Chinese bats. *Emerging microbes & infections* **7**, 1-10 (2018).
2. M. A. Marra *et al.*, The genome sequence of the SARS-associated coronavirus. *Science* **300**, 1399-1404 (2003).
3. B. He *et al.*, Identification of diverse alphacoronaviruses and genomic characterization of a novel severe acute respiratory syndrome-like coronavirus from bats in China. *Journal of virology* **88**, 7070-7082 (2014).
4. S. K. Lau *et al.*, Ecoepidemiology and complete genome comparison of different strains of severe acute respiratory syndrome-related Rhinolophus bat coronavirus in China reveal bats as a reservoir for acute, self-limiting infection that allows recombination events. *Journal of virology* **84**, 2808-2819 (2010).
5. Z. Wu *et al.*, Deciphering the bat virome catalog to better understand the ecological diversity of bat viruses and the bat origin of emerging infectious diseases. *The ISME journal* **10**, 609-620 (2016).
6. X.-Y. Ge *et al.*, Isolation and characterization of a bat SARS-like coronavirus that uses the ACE2 receptor. *Nature* **503**, 535-538 (2013).
7. B. Hu *et al.*, Discovery of a rich gene pool of bat SARS-related coronaviruses provides new insights into the origin of SARS coronavirus. *PLoS pathogens* **13**, (2017).
8. J. J. A. Armenteros *et al.*, SignalP 5.0 improves signal peptide predictions using deep neural networks. *Nature biotechnology* **37**, 420-423 (2019).
9. A. Krogh, B. Larsson, G. Von Heijne, E. L. Sonnhammer, Predicting transmembrane protein topology with a hidden Markov model: application to complete genomes. *Journal of molecular biology* **305**, 567-580 (2001).
10. J. Söding, A. Biegert, A. N. Lupas, The HHpred interactive server for protein homology detection and structure prediction. *Nucleic acids research* **33**, W244-W248 (2005).
